# Supplementary material for: Engineering prokaryotic channels for control of mammalian tissue excitability
Source: PubMed Central journal article supplement (PMC5071848; doi:10.1038/ncomms13132), 2016-10-18
Supplement: ncomms13132-s1.pdf [file ncomms13132-s1.pdf]

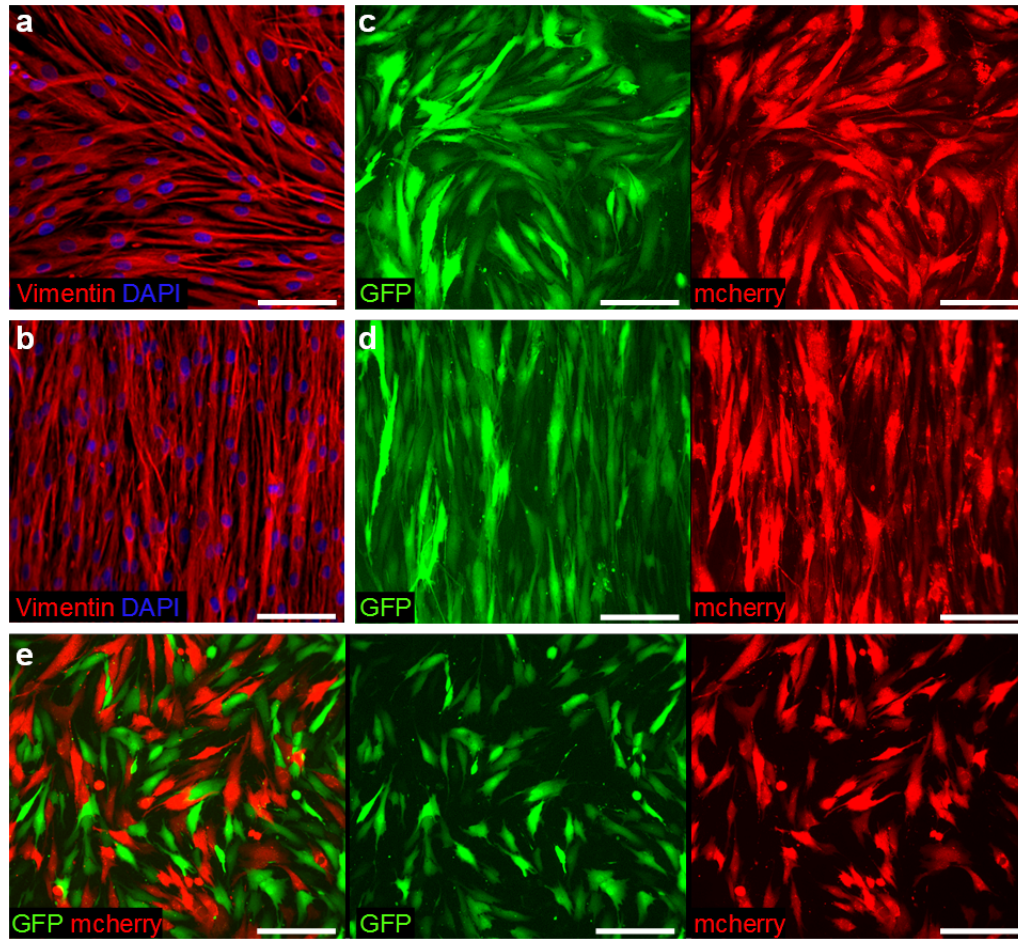

1 **Supplementary Figure 1 | Structure and lentiviral co-transduction of E-HDF**  
 2 **monolayers. (a,b)** Representative images of Vimentin<sup>+</sup> E-HDFs in isotropic (a) or anisotropic  
 3 (b) monolayers. (c,d) Strong, ubiquitous co-expression of eGFP (left) and mCherry (right) in  
 4 isotropic (c) and anisotropic (d) E-HDF monolayers co-transduced with pRRL-CMV-NavSheP  
 5 D60N-P2A-Kir2.1-T2A-eGFP and pRRL-CMV-Cx43-P2A-mCherry lentiviruses. (e) Mixed  
 6 culture of HDFs transduced with pRRL-CMV-NavSheP D60N-P2A-Kir2.1-T2A-eGFP and  
 7 HDFs transduced with pRRL-CMV-Cx43-P2A-mCherry virus shown as a control to demonstrate  
 8 no cross-talk between read and green channels. Scale bars, 100 μm.  
 9

10  
 11  
 12

```

NaChBac -----M--KMEARQKQNSFTSKMVKIVNHRAFFTFVIALILFNALVIGIETYPRIYADHKWLFYRIDLVLLWIFITIEIAMRFLASNPKSAFFRSSMNFDFLIVAAGHIFAGA-QFVT 110
NavSheP -----MSTSLLNAPTGLQARVINLVEQNIWFGHFLTLLINAVQLGMEETSASLMAQYGALLMSLDKVLVSVFVVELLLRIYAYRG--KFFKDPNMFVDFTVIVIALIPAS--GPLA 107
NavRosD -----MGVREQLDIWLDRNIVNVIIVAVIIIFNAILLGMEETSQIMAEAGDLIIMLDKACLTFVVEIFLKLVARGR--RFFKSGMNFDFVLVIGAAALVPGS--QTMS 98
NavBacL -----MNTHQNRYSQSKVSALINCRLFQSFITTVIVLNAISIGLETYA--FFKPYQKVFVIVDCLFLTFVVEIELSLKLFV--QKQHFKNMNFDFVIVAGSLIYNT-NFVS 105
NavBp -----ME--NMPAEQQVPLVALAQRIVFHKAFTPTIITLIIINAIVIGLEIETPYTYQGYNDIFVYAADLALLWIFITIEITLRFIAARPTKSFKSSMNFDFLVLVAGHVFAGA-HFVT 111
NavSi1P -----MQRMQAFIDRPGGFRGITAVIMLNAVVLGMEETSPYLMERMGGLLAADRICLGFIVEIALKLTARQ--RFFLNGMNLDFDVIGIALIPAA--GGLS 95
NavSu1P -----MVGTVNMRERLGRWVEGRAVSNFIIGVIVFNAALLGMEETAPALMEKYGTLLIFLDRVCLFIFIAEITLKIARGV--GFFRNGMNFDFTVVAIALVPAV--GGLS 102
NavPz -----MSLRARLDALVHGRRAQGVITGVILFNVALLGLSETSGRVMVAVGPIILLDAACLAVFAEIAAKLIARGP--RFFRDMNFDFVSVVAIALMPAG--QGLS 98
NavAb1 -----MQATPSSV-PAANAWRQLSAHLNSSLFANSITAILLNAIILGVETSSVAQERVQWLLTVNQVILFAFTLEIALKLVAFGP--RFFRSGMNFDFLIVAISLTPAS--GPLA 108
NavAb -----MYLRITNIVESSFFTKFIIVLVLNGITMGLSETSKTFMQSGVGYTLLNQVITVITFIEIILRIYVHRI--SFFKDPWSLDFDFVVAISLTPAS--SGFE 96
NavMs -----MSRKIRDLESKRFQNVITAIIVLNGAVLGLTDTLTSASSQNLLEVDQLCLTFIVEISLKIYAYGVR--GFFRSGMNLDFDVIVAIALMPAQ--GGLS 97
NavCt -----MSHI--HERHSQKHPIEAMCDLWVHPRFTSAIIVLIVINAVVGMETYPGIYQYQDWFYLDIIRMLWVFAEIIKLVATRPRYHFFKDSMNFDFLIVASGLFVGA-QFVT 113
NavAe MSEQPDLVGHKQVHPEDETLRGLAWFIDRPGTQYFVGLILVNAITLGHUITSPEVTAYLQPHLGMWNTFIIAAFFVEISLRIADGP--RFRVSGMNLDFDVVAISLVPDS--GAFS 116
NavRh -----HTPFSSLKDNRIQFTVWSIILNVALIGATITVEL-DPLFLETIHLLDYGITIFFVVEIILIRFIEGKQKADFFKSGMNFDFTVIVAISLTPINNSSFL 99

```

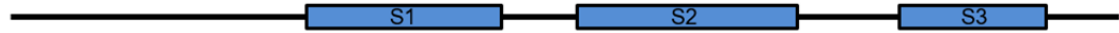

```

NaChBac VLRLRLVRLVRLRAISVVPRLRLVLDALVMTIPALGNILILMSIIFYFVAVIGTMLFQVHSPEYFGNLQLSLLTLFQVVTLESMSGVMRPIFAEVPWSWLYFVSVFLIGTFIIFNLFIGV 230
NavSheP VLRLRLVRLVRLVRLVIVPSSMKRVVVALGSLPLGASIAATVLLIIFYFVAVIATKIFGDAFPEWFGTIDASFYTLFQIMTLESMSGIRPVMVEVYPAWVFFVFPFLVATFVNLNLFIAI 227
NavRosD VLRLRLVRLVRLVRSVAPSLRRVVEGFVALPGMGSVFLMAIIFYFGVISTKLFASFQWFGSLPQSGYTLFQIMTLESMSGIVRPMVEVYPAWVFFVFPFLVATFVNLNLFIAI 218
NavBacL VLRLRLVRLVRLVRLVRSVAPSLRRVVEGFVALPGMGSVFLMAIIFYFGVISTKLFASFQWFGSLPQSGYTLFQIMTLESMSGIVRPMVEVYPAWVFFVFPFLVATFVNLNLFIAI 225
NavBp VLRLRLVRLVRLVRAISVVPRLRLVLDALVMTIPALGNILILMSIIFYFVAVIGTMLFQVHSPEYFGNLQLSLLTLFQVVTLESMSGVMRPIFAEVPWSWLYFVSVFLIGTFIIFNLFIGV 231
NavSi1P VLRLRLVRLVRLVRSVAPSLRRVVEGFVALPGMGSVFLMAIIFYFGVISTKLFASFQWFGSLPQSGYTLFQIMTLESMSGIVRPMVEVYPAWVFFVFPFLVATFVNLNLFIAI 215
NavSu1P VLRLRLVRLVRLVRSVAPSLRRVVEGFVALPGMGSVFLMAIIFYFGVISTKLFASFQWFGSLPQSGYTLFQIMTLESMSGIVRPMVEVYPAWVFFVFPFLVATFVNLNLFIAI 222
NavPz VLRLRLVRLVRLVRSVAPSLRRVVEGFVALPGMGSVFLMAIIFYFGVISTKLFASFQWFGSLPQSGYTLFQIMTLESMSGIVRPMVEVYPAWVFFVFPFLVATFVNLNLFIAI 218
NavAb1 ILRLRLVRLVRLVRLVRSVAPSLRRVVEGFVALPGMGSVFLMAIIFYFGVISTKLFASFQWFGSLPQSGYTLFQIMTLESMSGIVRPMVEVYPAWVFFVFPFLVATFVNLNLFIAI 228
NavAb ILRLRLVRLVRLVRLVRSVAPSLRRVVEGFVALPGMGSVFLMAIIFYFGVISTKLFASFQWFGSLPQSGYTLFQIMTLESMSGIVRPMVEVYPAWVFFVFPFLVATFVNLNLFIAI 216
NavMs VLRLRLVRLVRLVRSVAPSLRRVVEGFVALPGMGSVFLMAIIFYFGVISTKLFASFQWFGSLPQSGYTLFQIMTLESMSGIVRPMVEVYPAWVFFVFPFLVATFVNLNLFIAI 217
NavCt VLRLRLVRLVRLVRSVAPSLRRVVEGFVALPGMGSVFLMAIIFYFGVISTKLFASFQWFGSLPQSGYTLFQIMTLESMSGIVRPMVEVYPAWVFFVFPFLVATFVNLNLFIAI 233
NavAe VLRLRLVRLVRLVRSVAPSLRRVVEGFVALPGMGSVFLMAIIFYFGVISTKLFASFQWFGSLPQSGYTLFQIMTLESMSGIVRPMVEVYPAWVFFVFPFLVATFVNLNLFIAI 236
NavRh VLRLRLVRLVRLVRSVAPSLRRVVEGFVALPGMGSVFLMAIIFYFGVISTKLFASFQWFGSLPQSGYTLFQIMTLESMSGIVRPMVEVYPAWVFFVFPFLVATFVNLNLFIAI 218

```

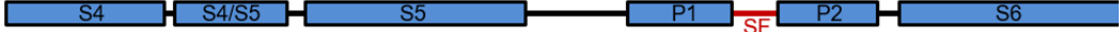

```

NaChBac IVNVMKEAELTDN--EEDGEA-----DGLKQEISALRKDVAEL-----KSLLKQSK----- 274
NavSheP IVNMTQTFSDDEHALEREQD-----KQILEQEQRWHEELKAIKLELQQLTLRNAAGDSSNVSTKGNIGSD 295
NavRosD IVNSMQDAHQQEAGEQTDAY-----RDEVL SRLIAIEEKL----- 253
NavBacL IVNNAQKISQEIETDGTGL-----KEDTKEIKELRAEVKEL-----KALLQTYITQNEKDD----- 276
NavBp IVNVMKEANEELKSELDDKE-----ADTKEELASLRNEVAEM-----KDLIKM'KHQQT'KGG----- 284
NavSi1P IVNSMQDAHHAEDGERTDAY-----RDEVLARLEQIDQRLNAL-----GETTK----- 258
NavSu1P IVNSMQDAHNEEETVRTDAY-----RLEVMEKLEAIEKK----- 256
NavPz IVNSMQDAHQAESAATDAY-----RDEVLMLRAIEKQLDES-----GGRGRV----- 262
NavAb1 IVSATQEVHSEQRAREANNI---LIAHDERQEMLDL'RAM'HA'KIVALEAAQQGKA-----GQ----- 283
NavAb IVDAMAILNQKEEQHIIDEVQ---SHEDININNEI---IKLREEIIVEL-----KELIKTSLKNI----- 267
NavMs IVDAMAITKEQEEAATGHH-----QEPISQTLHLGLDRDLRIEKQLAQHNELLQRQQPK-----K----- 274
NavCt IVSNVRAETEDAEEQEGREERQGLFEGDSSVSAEEIAKLRQEIKEL-----RQLL'KEL'KD'HSQSST----- 298
NavAe IIESMQSAHNEAEDAKRIEQE---QRAHDERLEMLQLIRDLSKVDRLERRSGKR----- 288
NavRh LVDVWIQKLL----- 228

```

13  
14 **Supplementary Figure 2 | Homology of different BacNa<sub>v</sub> orthologs.** Residues E43 and D60  
15 are indicated by green and red arrows respectively. The main regions labeled are: S1-S6  
16 transmembrane helices, S4/S5 linker, P1 and P2 pore helices, and selectivity filter (SF). The  
17 BacNa<sub>v</sub> orthologs listed have been previously characterized either structurally or functionally:  
18 NaChBac (*Bacillus halodurans*), NavSheP (*Shewanella putrefaciens*), NavRosD (*Roseobacter*  
19 *denitrificans*), NavBacL (*Bacillus licheniformis*), NavBp (*Bacillus pseudofirmus*), NavSi1P  
20 (*Silicibacter pomeroyi*), NavSu1P (*Sulfitobacter pontiacus*), NavPz (*Paracoccus*  
21 *zeaxanthinifaciens*), NavAb1 (*Alcanivorax borkumensis*), NavAb (*Arcobacter butzleri*), NavMs  
22 (*Magnetococcus marinus*), NavCt (*Caldalkalibacillus thermarum*), NavAe (*Alkalilimnicola*  
23 *ehrllichii*), and NavRh (*Rickettsiales sp.*)

24  
25

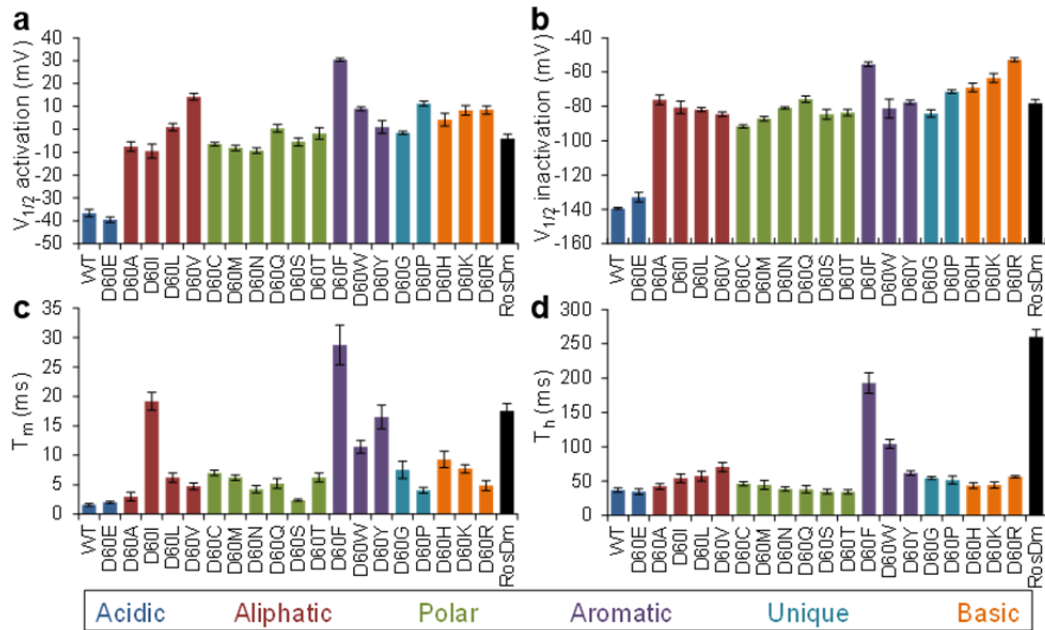

26

27 **Supplementary Figure 3 | Electrophysiological properties of  $\text{Na}_v\text{SheP}$  mutants.** (a,b) Mid-  
 28 points ( $V_{1/2}$ ) of activation (a) and inactivation (b) curves of  $\text{Na}_v\text{SheP}$  mutants exhibit different  
 29 depolarization shifts relative to the  $V_{1/2}$  of the wild-type (WT) channel. (c,d) Time constants of  
 30 activation ( $\tau_m$ , c) and inactivation ( $\tau_h$ , d) measured at +20mV. Color-coding into groups is based  
 31 on the characteristics of the respective amino acid side chains at residue 60. Recordings were  
 32 performed at 25°C (n = 4-10). Supplementary Table 1 shows a complete list of all activation and  
 33 inactivation parameters. Error bars indicate s.e.m.

34

35

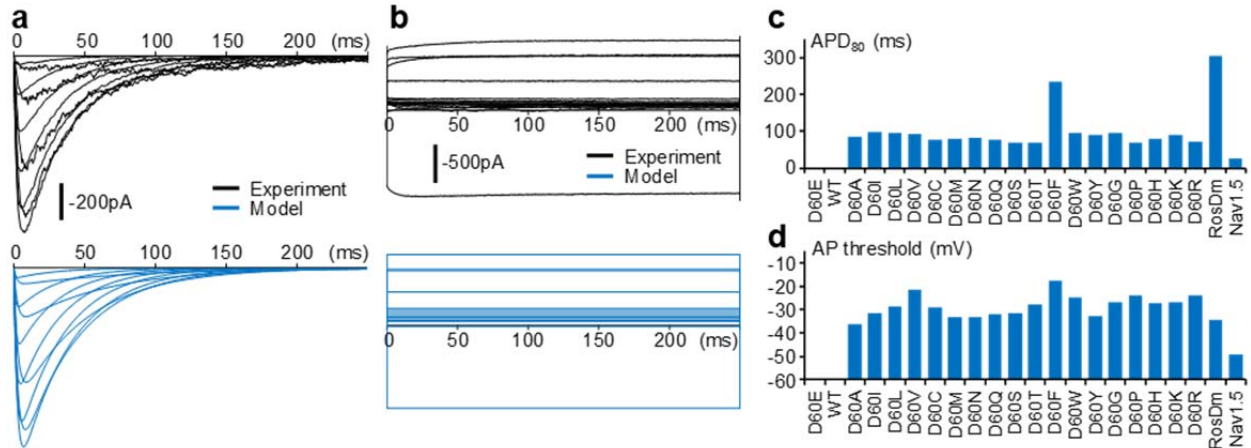

36  
 37 **Supplementary Figure 4 | Computational modeling of E-HDF electrophysiology.** (a)  
 38 Representative whole-cell voltage clamp recording of  $\text{Na}_v\text{SheP D60A}$  current in E-HDFs and the  
 39 corresponding computational traces. (b) Representative whole-cell voltage clamp recording of  $I_K$   
 40 current in E-HDFs and the corresponding computational traces. (c,d) AP characteristics of E-  
 41 HDFs expressing different  $\text{BacNa}_v$  mutants or  $\text{Na}_v1.5$ , obtained by computational modeling:  
 42  $\text{APD}_{80}$  (c) and AP threshold (d). For modeling  $\text{BacNa}_v$  currents, parameters derived from  
 43 voltage-clamp measurements at  $25^\circ\text{C}$  were scaled for the temperature of  $37^\circ\text{C}$ . Highly  
 44 hyperpolarized inactivation of WT and D60E channels prevented AP initiation.  
 45

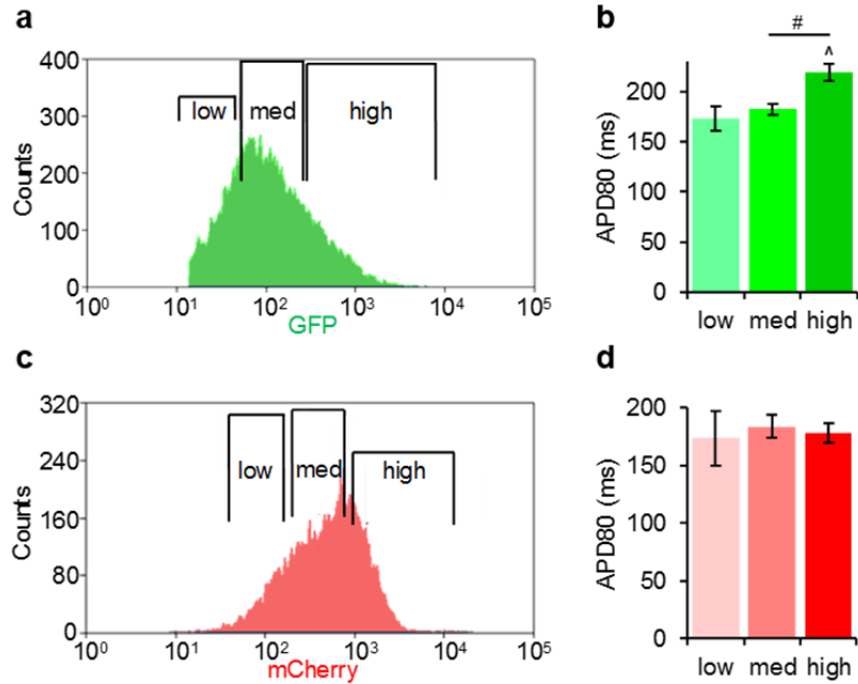

46

47 **Supplementary Figure 5 | Use of FACS to tune electrophysiological properties of E-Fibs.** (a)  
 48 E-HDFs generated by co-transduction with Na<sub>v</sub>SheP D60N-P2A-eGFP-Kir2.1 and Cx43-P2A-  
 49 mCherry were sorted into three groups based on the level of eGFP expression (low, medium,  
 50 high). (b) Optical mapping of eGFP-sorted E-HDFs showed longer APD<sub>80</sub> associated with higher  
 51 eGFP intensity (n = 6-10). (c-d) When E-HDFs were sorted into three groups based on mCherry  
 52 expression level (low, medium, high, c), APD<sub>80</sub> was comparable among the groups (d, n = 5).  
 53 #P<0.01; ^P<0.05 vs low eGFP group in b. Error bars indicate s.e.m; statistical significance was  
 54 determined by one-way ANOVA, followed by Tukey's *post hoc* test to calculate P values.

55

56

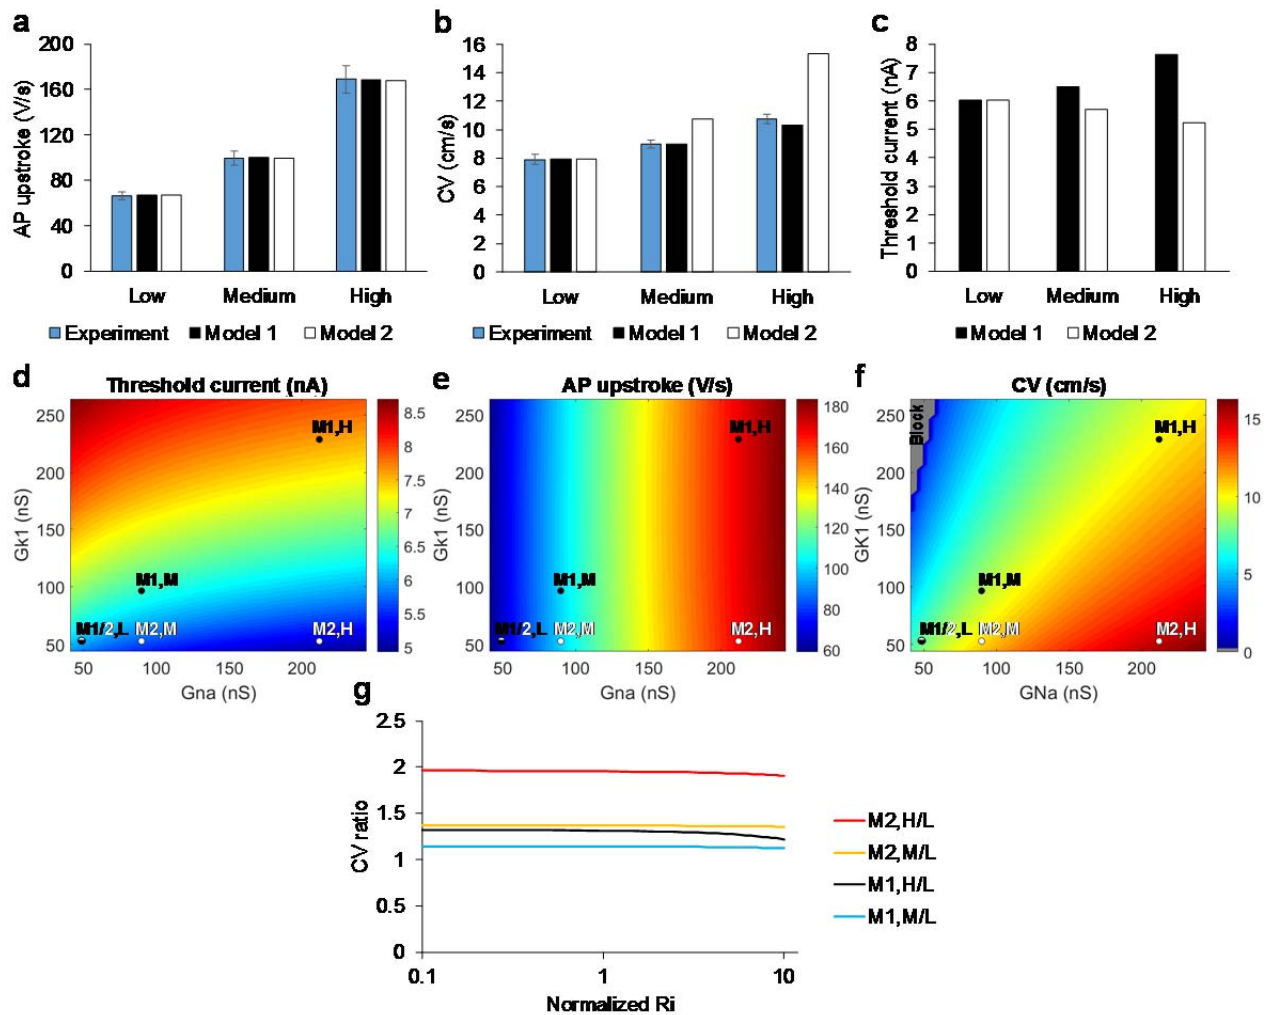

59 **Supplementary Figure 6 | Computational studies of BacNav and Kir2.1 effects on E-HDF**  
60 **electrical properties.** (a-c) Maximum AP upstroke velocity (a), conduction velocity (b), and  
61 threshold current required to elicit AP (c) in E-HDFs expressing varying levels (low, medium,  
62 and high) of both NavSheP D60N and Kir2.1 (model 1) or the low level of Kir2.1 and varying  
63 levels of only NavSheP D60N (model 2). Experimental data for AP upstroke and CV shown in  
64 Fig. 3e,h are included for comparison. (d-f) Simulated effects of varying BacNav and Kir2.1  
65 conductance values ( $G_{Na}$  and  $G_{K1}$ ) on threshold current (d), AP upstroke (e), and CV (f). Solid  
66 circles denote low (L), medium (M), or high (H) groups using either model 1 (M1, black circles)  
67 or model 2 (M2, white circles) shown in panels a-c. (g) Effects of varying intercellular  
68 resistivity,  $R_i$  (shown relative to nominal  $R_i$  value used in panels b and f), on CV ratios between  
69 the groups. Error bars indicate s.e.m.

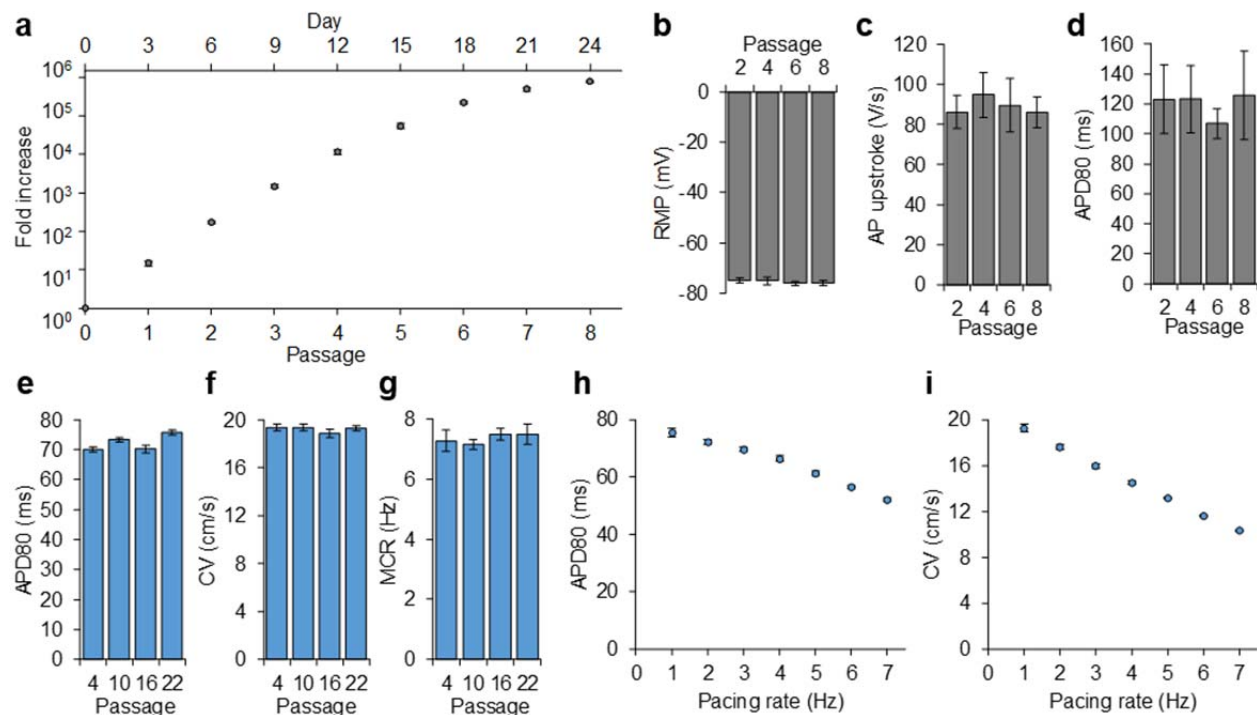

72

73 **Supplementary Figure 7 | Stability of engineered cell phenotypes during long-term**  
 74 **expansion.** (a) Growth curve of E-HDFs transduced with Na<sub>v</sub>SheP D60N-Kir2.1 lentivirus  
 75 following initial expansion and FACS. Cells senesced at passage eight. (b-d) Resting membrane  
 76 potential (b), maximum AP upstroke velocity (c), and APD<sub>80</sub> (d) of E-HDFs at various passages  
 77 throughout expansion assessed by patch clamp recordings (n = 8-10). (e-g) Optical mapping  
 78 studies in monolayers of monoclonal E-HEK293 cells expressing Na<sub>v</sub>SheP D60A, Kir2.1, and  
 79 Cx43, showing stable APD<sub>80</sub> (e), CV (f), and maximum capture rate (MCR, g) during 22  
 80 passages (n = 6-8). Properties beyond passage 22 were not examined and were presumed to  
 81 remain stable. (h,i) Dependence of APD<sub>80</sub> (h) and CV (i) on pacing rate in monolayers made  
 82 from passage 22 E-HEK293 cells (n = 6). AP conduction at each pacing rate was mapped after  
 83 30s of pacing. All data were obtained at 37°C. Error bars indicate s.e.m; statistical significance  
 84 was determined by one-way ANOVA.

85

86

87

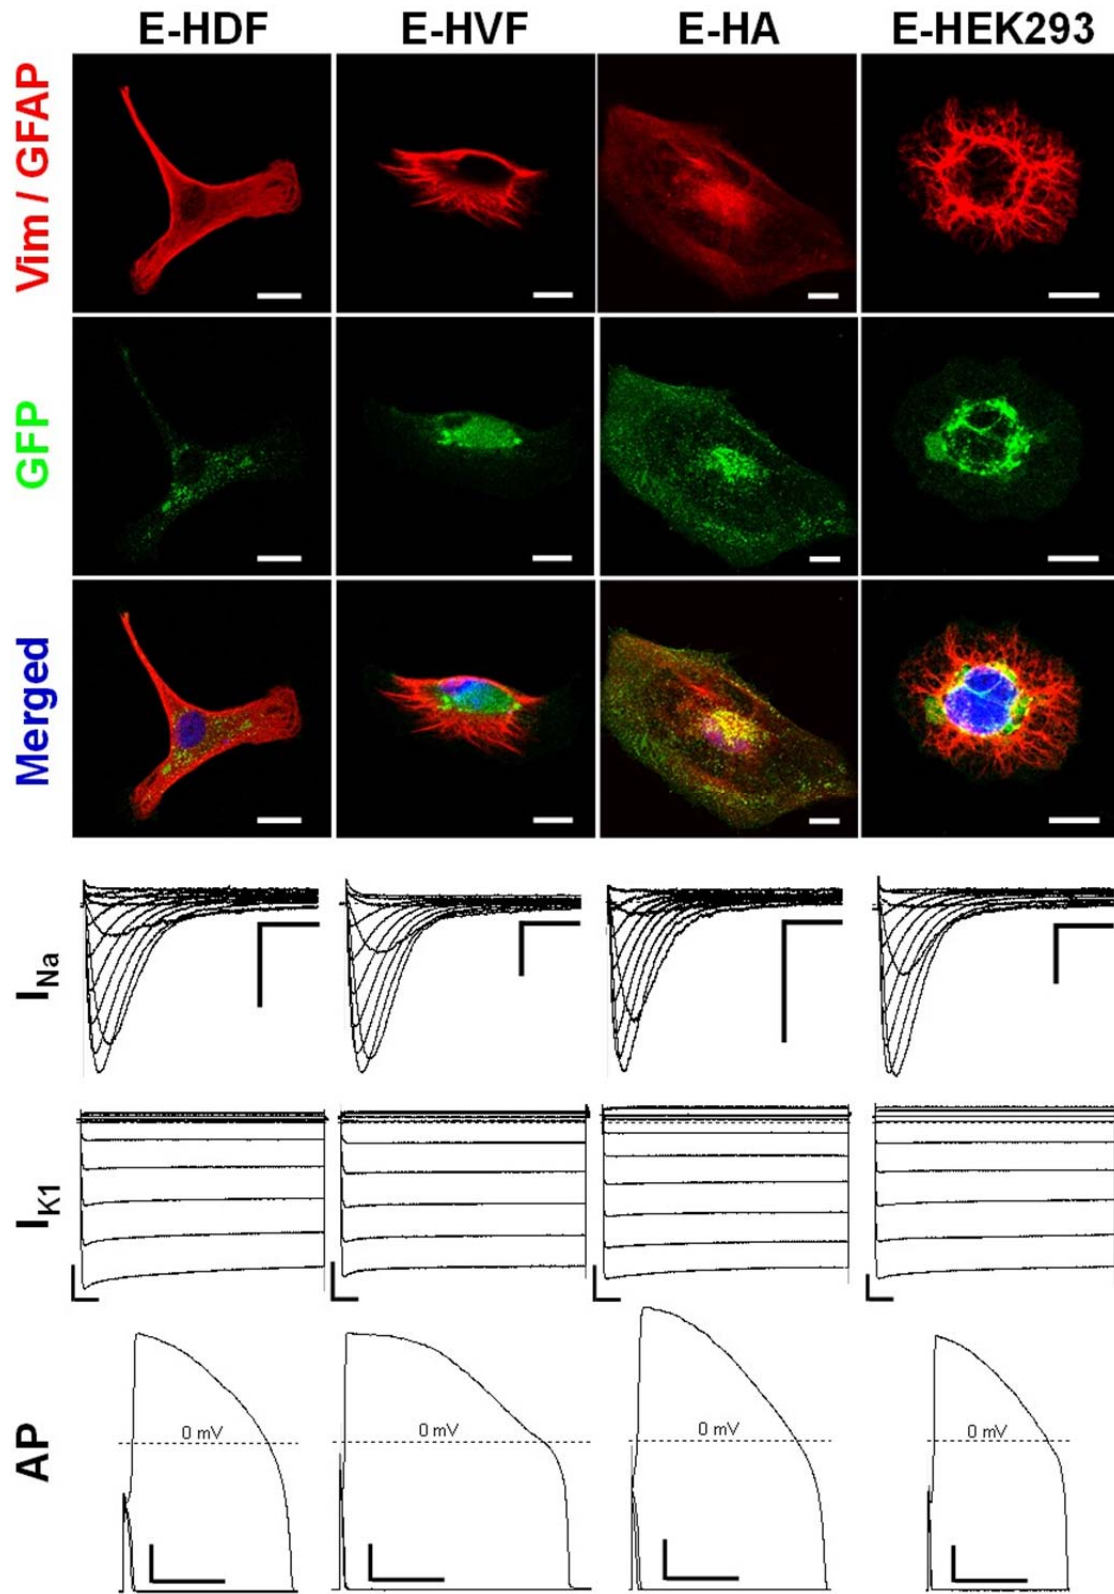

88  
 89 **Supplementary Figure 8 | Induction of excitability in various types of unexcitable human**  
 90 **cells.** Each human cell type (shown in different columns) was transduced with  $Na_v$ SheP D60N-  
 91 P2A-eGFP- $K_{ir}2.1$  lentivirus, expanded, and analyzed by voltage and current clamp recordings.



92 Engineered human astrocytes (E-HAs) were labeled for Glial fibrillary Acidic Protein (GFAP),  
93 while engineered human dermal fibroblasts (E-HDFs), human ventricular fibroblast (E-HVFs),  
94 and human embryonic kidney 293 cells (E-HEK293s) were labeled for vimentin. Scale bars:  
95 20 $\mu$ m (immunostaining images), 100ms and 2 nA ( $I_{Na}$  and  $I_K$  recordings), 25ms and 20mV (AP  
96 recordings).  
97

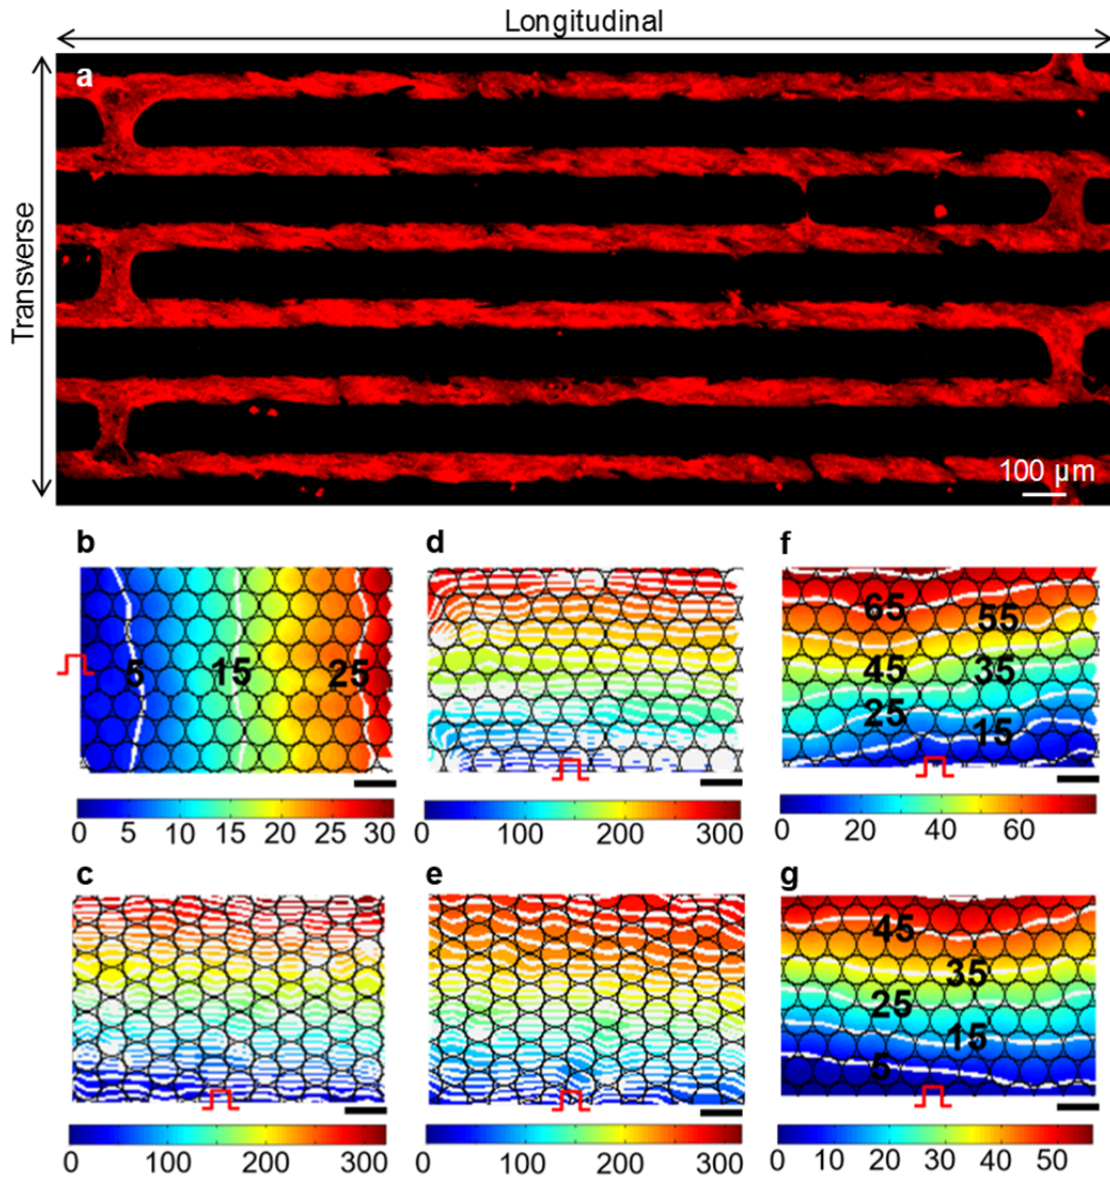

98

99 **Supplementary Figure 9 | Use of E-HDFs to improve impaired cardiomyocyte conduction.**

100 (a) A zig-zag pattern of neonatal rat cardiomyocytes (CMs) used to simulate fast longitudinal  
 101 and slow transverse AP conduction characteristic of cardiac tissue with interstitial fibrosis. Cells  
 102 were stained with  $\alpha$ -sarcomeric actin (red). (b,c) Representative fast longitudinal conduction (b)  
 103 and slow transverse conduction (c) in CM monoculture. (d,e) Slow unaltered transverse  
 104 conduction in CM + wt HDF co-culture (d) and CM + Na<sub>v</sub>ShePD60A+Kir2.1 HDF co-culture  
 105 (e). (f,g) Moderately and significantly improved transverse conduction in CM + Cx43 HDF (f)  
 106 and CM + E-HDF (g) co-cultures, respectively. In b-g: Scale bars, 1 mm. Pulse signs indicate  
 107 positions of line stimulation. Circles denote recording sites.

108

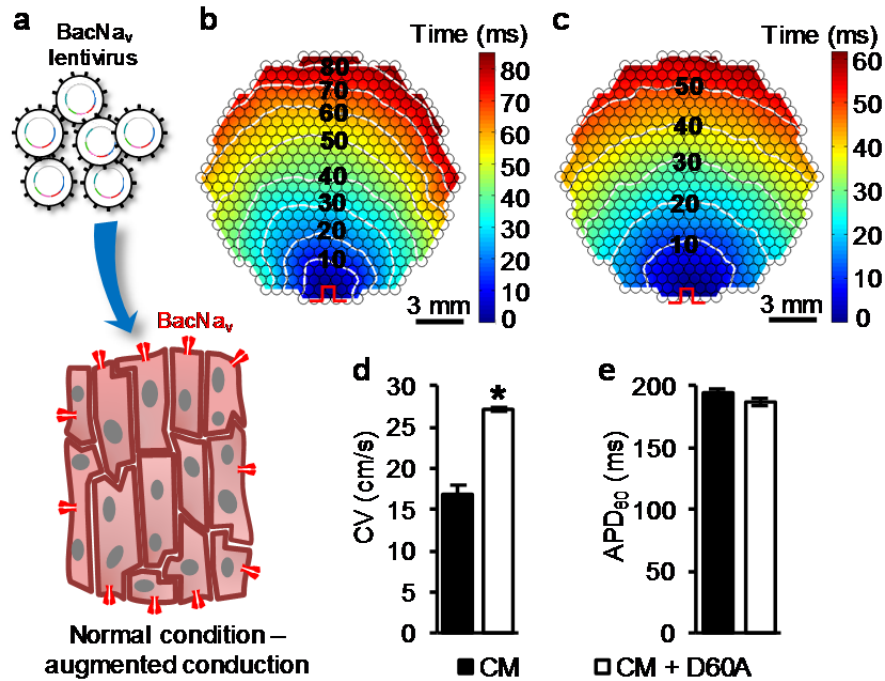

109

110 **Supplementary Figure 10 | Enhancement of cardiac AP conduction by BacNav expression.**

111 (a) Schematic depicting exogenous expression of BacNav<sub>v</sub> in cardiomyocytes (CMs) to augment  
 112 conduction. (b,c) Representative isochrone maps of AP conduction in electrically stimulated  
 113 isotropic monolayers of control neonatal rat CMs (b) and CMs transduced with Na<sub>v</sub>SheP D60A  
 114 lentivirus (c). (d,e) CM monolayers transduced with Na<sub>v</sub>SheP D60A lentivirus (CM + D60A)  
 115 show increased CV (d) and unaltered APD<sub>80</sub> (e) compared to control CM monolayers (n = 5).  
 116 \*P<0.001 vs control CM. Pulse signs indicate location of stimulating electrode. Circles denote  
 117 504 recording sites. Error bars indicate s.e.m; statistical significance was determined by an  
 118 unpaired Student's t-test to calculate P value.

119

120

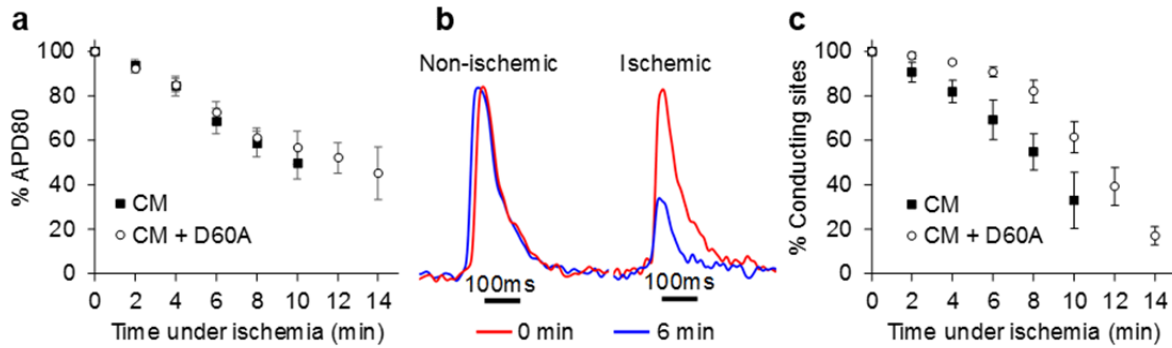

121

122 **Supplementary Figure 11 | Consequences of ischemia on AP duration and firing in CM**  
 123 **monolayers with regional ischemia.** (a) With time of ischemia, AP duration gradually  
 124 decreases in the ischemic region of monolayers made of either control cardiomyocytes (CM) or  
 125 cardiomyocytes transduced with NavSheP D60A (CM + D60A) (n = 6). (b) Representative  
 126 optical AP traces in the non-ischemic (peripheral) and ischemic (central) regions of the  
 127 monolayer before (0 min) and during ischemia (6 min). (c) With time of ischemia, number of  
 128 actively conducting recording sites within ischemic region is progressively reduced (n = 6). Error  
 129 bars indicate s.e.m.

130

| Channel    | Activation     |                   |                    | Inactivation   |                   |                    |
|------------|----------------|-------------------|--------------------|----------------|-------------------|--------------------|
|            | $V_{1/2}$ (mV) | Slope factor (mV) | Time constant (ms) | $V_{1/2}$ (mV) | Slope factor (mV) | Time constant (ms) |
| SheP WT    | -36.7          | 8.1               | 1.6                | -139.5         | 8.9               | 31.7               |
| D60E       | -39.6          | 7.4               | 2.0                | -132.9         | 9.5               | 27.8               |
| D60A       | -7.6           | 7.1               | 3                  | -76.1          | 9                 | 42.4               |
| D60I       | -9.5           | 6.8               | 19.2               | -80.6          | 7.8               | 54                 |
| D60L       | 0.9            | 7.3               | 6.2                | -81.9          | 10.1              | 57.3               |
| D60V       | 14.2           | 8.2               | 4                  | -84.6          | 10.4              | 70.5               |
| D60C       | -6.5           | 7.3               | 7                  | -91.7          | 9.2               | 46.3               |
| D60M       | -8.1           | 7.6               | 6.2                | -87.1          | 8.6               | 44.5               |
| D60N       | -9.3           | 6.2               | 4.2                | -80.8          | 9.8               | 38.6               |
| D60Q       | 0.5            | 7.7               | 5.2                | -75.8          | 8.5               | 38.2               |
| D60S       | -5.5           | 7                 | 2.4                | -84.6          | 8.6               | 34.9               |
| D60T       | -1.8           | 6.8               | 6.2                | -83.6          | 8.2               | 34.3               |
| D60F       | 30.4           | 8.9               | 28.8               | -55.4          | 8.6               | 193                |
| D60W       | 8.9            | 11                | 11.4               | -81.2          | 9.7               | 104.5              |
| D60Y       | 1              | 8.7               | 16.5               | -77.5          | 8.9               | 61.9               |
| D60G       | -1.5           | 6.6               | 7.5                | -84.2          | 9.4               | 54.6               |
| D60P       | 11.3           | 7.5               | 4                  | -71.4          | 10.5              | 51.6               |
| D60H       | 4.3            | 6.9               | 9.3                | -69            | 8                 | 43.6               |
| D60K       | 8.3            | 7.5               | 7.7                | -63.4          | 7.5               | 44.3               |
| D60R       | 8.4            | 6.4               | 4.8                | -52.8          | 7.2               | 56.4               |
| E43A       | 0.3            | 8.2               | 3.5                | -57.7          | 13.2              | 53.1               |
| E43L       | 2.9            | 8.2               | 2.4                | -87.3          | 7.5               | 92                 |
| E43V       | 10             | 8.3               | 4                  | -106.4         | 10.5              | 40.2               |
| E43N       | 0              | 8.2               | 2.6                | -61.3          | 15.8              | 58.2               |
| E43Q       | 25.1           | 9.2               | 2.5                | -44.1          | 15.5              | 82.9               |
| E43S       | 5.5            | 10                | 4.5                | -58.7          | 14                | 23.6               |
| E43T       | -2.5           | 7.6               | 2.7                | -68.8          | 4.5               | 51.8               |
| E43H       | 16.7           | 11.3              | 4.4                | -69.9          | 14.6              | 53.9               |
| E43K       | 12.8           | 10.5              | 3                  | -50.3          | 11.2              | 24.1               |
| RosD G217A | -16.6          | 10.5              | 17.5               | -78.2          | 9.8               | 260.2              |

131  
132  
133  
134  
135  
136

**Supplementary Table 1 | Biophysical properties of BacNa<sub>v</sub> mutants.** Activation and inactivation time constants were measured at +20mV clamp potential. Recordings were performed at 25<sup>0</sup>C. Data shown are mean values (n = 4-10).

137

138

139

140

141

142

143

144

145

| E43X | Primers                                                                                        | D60X | Primers                                                                                                          |
|------|------------------------------------------------------------------------------------------------|------|------------------------------------------------------------------------------------------------------------------|
| E43A | 5'-ggctggctgaggtgccatacctaactgc-3'<br>5'-gcagttaggtatggcgacctcagccagcc-3'                      | D60A | 5'-aaatacactcagtagcaacttagcaagactatcaacaagacc-3'<br>5'-ggtactttgtgatgagtcctgctaagttgactcagtgattt-3'              |
| E43C | 5'-catcaggctggctgaggtgcacatacctaactgcaccgc-3'<br>5'-gcggctcagttaggtatgtgcacctcagccagcctgatg-3' | D60C | 5'-cacaatacactcagtagcaacttaaaagactcatcaacaagaccgtat-3'<br>5'-atacggctactttgtgatgagtccttgaagttgactcagtgattttg-3'  |
| E43D | 5'-ctgctgaggtatccatacctaactgcaccgc-3'<br>5'-cgctggctcagttaggtatggatacctcagccagc-3'             | D60E | 5'-gtactttgtgatgagtcctgagaagttgactcagtgattttg-3'<br>5'-caatacactcagtagcaactctcaagactcatcaacaagacc-3'             |
| E43F | 5'-catcaggctggctgaggtgaacatacctaactgcaccgc-3'<br>5'-gcggctcagttaggtatgtgcacctcagccagcctgatg-3' | D60F | 5'-cacaatacactcagtagcaacttaaaagactcatcaacaagaccgtat-3'<br>5'-atacggctactttgtgatgagtccttgaagttgactcagtgattttg-3'  |
| E43G | 5'-ggctggctgaggtccccatacctaactgc-3'<br>5'-gcagttaggtatggggacctcagccagcc-3'                     | D60G | 5'-aaatacactcagtagcaacttaaaagactcatcaacaagacc-3'<br>5'-ggtactttgtgatgagtcctgctaagttgactcagtgattt-3'              |
| E43H | 5'-tcaggctggctgaggtatgcatacctaactgcacc-3'<br>5'-ggtcagttaggtatgcatacctcagccagcctga-3'          | D60H | 5'-atacactcagtagcaactatgaagactcatcaacaagacc-3'<br>5'-ggtactttgtgatgagtcctataagttgactcagtgattt-3'                 |
| E43I | 5'-catcaggctggctgaggtatcatacctaactgcaccgc-3'<br>5'-gcggctcagttaggtatgatacctcagccagcctgatg-3'   | D60I | 5'-cacaatacactcagtagcaacttaaaagactcatcaacaagaccgtat-3'<br>5'-atacggctactttgtgatgagtccttataagttgactcagtgattttg-3' |
| E43K | 5'-ggctggctgaggtcttcatacctaactgcac-3'<br>5'-gtcagttaggtatgaagacctcagccagcc-3'                  | D60K | 5'-cactcagtagcaactcttaagactcatcaacaagaccgtattg-3'<br>5'-gccaatacggctactttgtgatgagtccttaagagttgactcagtg-3'        |
| E43L | 5'-catcaggctggctgaggttaacatacctaactgcaccgc-3'<br>5'-gcggctcagttaggtatgtaaacctcagccagcctgatg-3' | D60L | 5'-cactcagtagcaacttaaaagactcatcaacaagaccgtattg-3'<br>5'-gccaatacggctactttgtgatgagtcctttaaagttgactcagtg-3'        |
| E43M | 5'-caggctggctgaggtcatacctaactgcacc-3'<br>5'-ggtcagttaggtatgatcactcagccagcctg-3'                | D60M | 5'-cactcagtagcaactcataagactcatcaacaagaccgtattg-3'<br>5'-gccaatacggctactttgtgatgagtccttaagagttgactcagtg-3'        |
| E43N | 5'-atcaggctggctgaggtattcatacctaactgcaccgc-3'<br>5'-cgctcagttaggtatgatacctcagccagcctgat-3'      | D60N | 5'-aatacactcagtagcaacttaaaagactcatcaacaagacc-3'<br>5'-cggtactttgtgatgagtcctataagttgactcagtgattt-3'               |
| E43P | 5'-caggctggctgaggtggcatacctaactgcacc-3'<br>5'-ggtcagttaggtatgccacctcagccagcctg-3'              | D60P | 5'-caatacactcagtagcaacttagaagactcatcaacaagaccgt-3'<br>5'-acggctactttgtgatgagtcctcaagttgactcagtgattttg-3'         |
| E43Q | 5'-ggctggctgaggtctgcatacctaactgcac-3'<br>5'-gtcagttaggtatgcagacctcagccagcc-3'                  | D60Q | 5'-actcagtagcaactctgaagactcatcaacaagaccgtattg-3'<br>5'-gcaatacggctactttgtgatgagtcctgaagttgactcagtg-3'            |
| E43R | 5'-caggctggctgaggtcctcatacctaactgcacc-3'<br>5'-ggtcagttaggtatgagacctcagccagcctg-3'             | D60R | 5'-caatacactcagtagcaacttagaagactcatcaacaagaccgt-3'<br>5'-acggctactttgtgatgagtcctcaagttgactcagtgattttg-3'         |
| E43S | 5'-caggctggctgaggtgcacatacctaactgcacc-3'<br>5'-ggtcagttaggtatgtgcacctcagccagcctg-3'            | D60S | 5'-cacaatacactcagtagcaacttaaaagactcatcaacaagaccgtat-3'<br>5'-atacggctactttgtgatgagtccttagaagttgactcagtgattttg-3' |
| E43T | 5'-caggctggctgaggtgcatacctaactgcacc-3'<br>5'-ggtcagttaggtatgacacctcagccagcctg-3'               | D60T | 5'-cacaatacactcagtagcaacttagaagactcatcaacaagaccgtat-3'<br>5'-atacggctactttgtgatgagtcctcaagttgactcagtgattttg-3'   |
| E43V | 5'-ggctggctgaggtcaccatacctaactgc-3'<br>5'-gcagttaggtatggtacctcagccagcc-3'                      | D60V | 5'-ggtactttgtgatgagtcctgtaagttgactcagtgattt-3'<br>5'-aaatacactcagtagcaacttaaaagactcatcaacaagacc-3'               |
| E43W | 5'-caggctggctgaggtccacatacctaactgcacc-3'<br>5'-ggtcagttaggtatgagacctcagccagcctg-3'             | D60W | 5'-cactcagtagcaactcacaagactcatcaacaagaccgtattg-3'<br>5'-gccaatacggctactttgtgatgagtccttgaagttgactcagtg-3'         |
| E43Y | 5'-atcaggctggctgaggtatacatacctaactgcaccgc-3'<br>5'-cggtcagttaggtatgatacctcagccagcctgat-3'      | D60Y | 5'-aatacactcagtagcaacttaaaagactcatcaacaagacc-3'<br>5'-cggtactttgtgatgagtccttataagttgactcagtgattt-3'              |

**Supplementary Table 2 | List of mutagenesis primers used to create Na<sub>v</sub>SheP E43X and D60X libraries (designed by QuikChange® Primer Design Program).**

**Ionic concentrations**

|                                             |          |
|---------------------------------------------|----------|
| Intracellular Na <sup>+</sup> concentration | 10.7 mM  |
| Extracellular Na <sup>+</sup> concentration | 135.3 mM |
| Intracellular K <sup>+</sup> concentration  | 120 mM   |
| Extracellular K <sup>+</sup> concentration  | 5.4 mM   |

**Membrane properties**

|                                                                         |                      |
|-------------------------------------------------------------------------|----------------------|
| Total membrane surface area (A)                                         | 2134 $\mu\text{m}^2$ |
| Total membrane capacitance ( $C_m$ )                                    | 22 pF                |
| BacNa <sub>v</sub> maximum conductance ( $\bar{G}_{\text{Na}}$ )        | 81.51 nS             |
| K <sub>ir</sub> 2.1 maximum total conductance ( $\bar{G}_{\text{K1}}$ ) | 87.93 nS             |
| Resting membrane potential ( $V_{\text{rest}}$ )                        | -80.1 mV             |
| Sodium Nernst potential ( $E_{\text{Na}}$ ) at 37 <sup>0</sup> C        | 67.8 mV              |
| Potassium Nernst potential ( $E_{\text{K}}$ ) at 37 <sup>0</sup> C      | -82.8 mV             |

**Core-conductor model parameters**

|                                         |                                 |
|-----------------------------------------|---------------------------------|
| Time step ( $\Delta t$ )                | 0.0025 ms                       |
| Space step ( $\Delta x$ )               | 24 $\mu\text{m}$                |
| Cable radius                            | 10.0 $\mu\text{m}$              |
| Cable length                            | 0.72 cm                         |
| Specific membrane capacitance ( $c_m$ ) | 1.031 $\mu\text{F}/\text{cm}^2$ |
| Intracellular resistivity ( $R_i$ )     | 1.48 k $\Omega$ .cm             |

146

147 **Supplementary Table 3 | Computational modeling parameters.** Cell membrane properties (A,  
 148  $C_m$ ,  $\bar{G}_{\text{Na}}$ ,  $\bar{G}_{\text{K1}}$ ,  $V_{\text{rest}}$ ,  $E_{\text{Na}}$ , and  $E_{\text{K}}$ ) used in the model were mean experimental values derived from  
 149 whole-cell voltage-clamp recordings in a monoclonal HEK293 line expressing K<sub>ir</sub>2.1, Cx43, and  
 150 Na<sub>v</sub>SheP D60A. Extracellular Na<sup>+</sup> and K<sup>+</sup> concentrations used in the model were the same as  
 151 used in the bath solution during patch clamp and optical mapping experiments. Intracellular Na<sup>+</sup>  
 152 and K<sup>+</sup> concentrations in the model were derived using Nernst equation, extracellular Na<sup>+</sup> and K<sup>+</sup>  
 153 concentrations and  $E_{\text{Na}}$  and  $E_{\text{K}}$ , respectively. Specific membrane capacitance ( $c_m$ ) used in the  
 154 model was obtained by dividing mean cell membrane capacitance ( $C_m$ ) with mean estimated cell  
 155 membrane surface area (A). Intracellular resistivity ( $R_i$ ) was adjusted to exactly simulate the  
 156 mean conduction velocity (21.04 cm/s) recorded by optical mapping in confluent isotropic  
 157 monolayers of the above-mentioned monoclonal HEK293 line expressing K<sub>ir</sub>2.1, Cx43, and  
 158 Na<sub>v</sub>SheP D60A.

159
